# Supplementary material for: Structural Premise of Selective Deubiquitinase USP30 Inhibition by Small-Molecule Benzosulfonamides
Source: PubMed Central journal article supplement (PMC10400906; doi:10.1016/j.mcpro.2023.100609), 2023-06-28

# Structural Premise of Selective Deubiquitinase USP30 Inhibition by Small-Molecule Benzosulfonamides

Darragh P O'Brien<sup>1\*</sup>, Hannah BL Jones<sup>1</sup>, Franziska Guenther<sup>2</sup>, Emma J Murphy<sup>2</sup>, Katherine S England<sup>2</sup>, Iolanda Vendrell<sup>1</sup>, Malcolm Anderson<sup>3</sup>, Paul Brennan<sup>2</sup>, John B Davis<sup>2</sup>, Adán Pinto-Fernández<sup>1,4</sup>, Andrew P Turnbull<sup>5</sup>, and Benedikt M Kessler<sup>1,4\*</sup>

<sup>1</sup>Target Discovery Institute, Centre for Medicines Discovery, Nuffield Department of Medicine, University of Oxford, UK

<sup>2</sup>ARUK-Oxford Drug Discovery Institute, Centre for Medicines Discovery, Nuffield Department of Medicine, University of Oxford, UK

<sup>3</sup>Waters Corporation, Wilmslow, Cheshire, UK

<sup>4</sup>Chinese Academy of Medical Sciences Oxford Institute, Nuffield Department of Medicine, University of Oxford, UK

<sup>5</sup>Cancer Research Horizons, Francis Crick Institute, London, UK

\*Corresponding authors: darragh.obrien@ndm.ox.ac.uk; benedikt.kessler@ndm.ox.ac.uk

## SUPPLEMENTAL FIGURES

### *Contents*

Figure S1: Purity profile of USP30<sub>inh</sub>

Figure S2: Confirmation of USP30 complex formation with USP30<sub>inh</sub>

Figure S3: Inhibition of USP30 cleavage of K6-linked Di-Ubiquitin by USP30<sub>inh</sub> as measured by RapidFire MS

Figure S4: Peptide map of USP30

Figure S5: HDX-MS uptake curves for individual USP30 peptides

Figure S6: Differential HDX-MS of USP30 and USP30<sub>inh</sub>

Figure S7: Architecture of USP30 inferred by HDX-MS

Figure S8: Temporal exchange of USP30

Figure S9: Structure of human USP30 in complex with the covalent inhibitor, 552

Figure S10: Structure of human USP30 in complex with the covalent inhibitor, 829

# Supplemental Figure 1

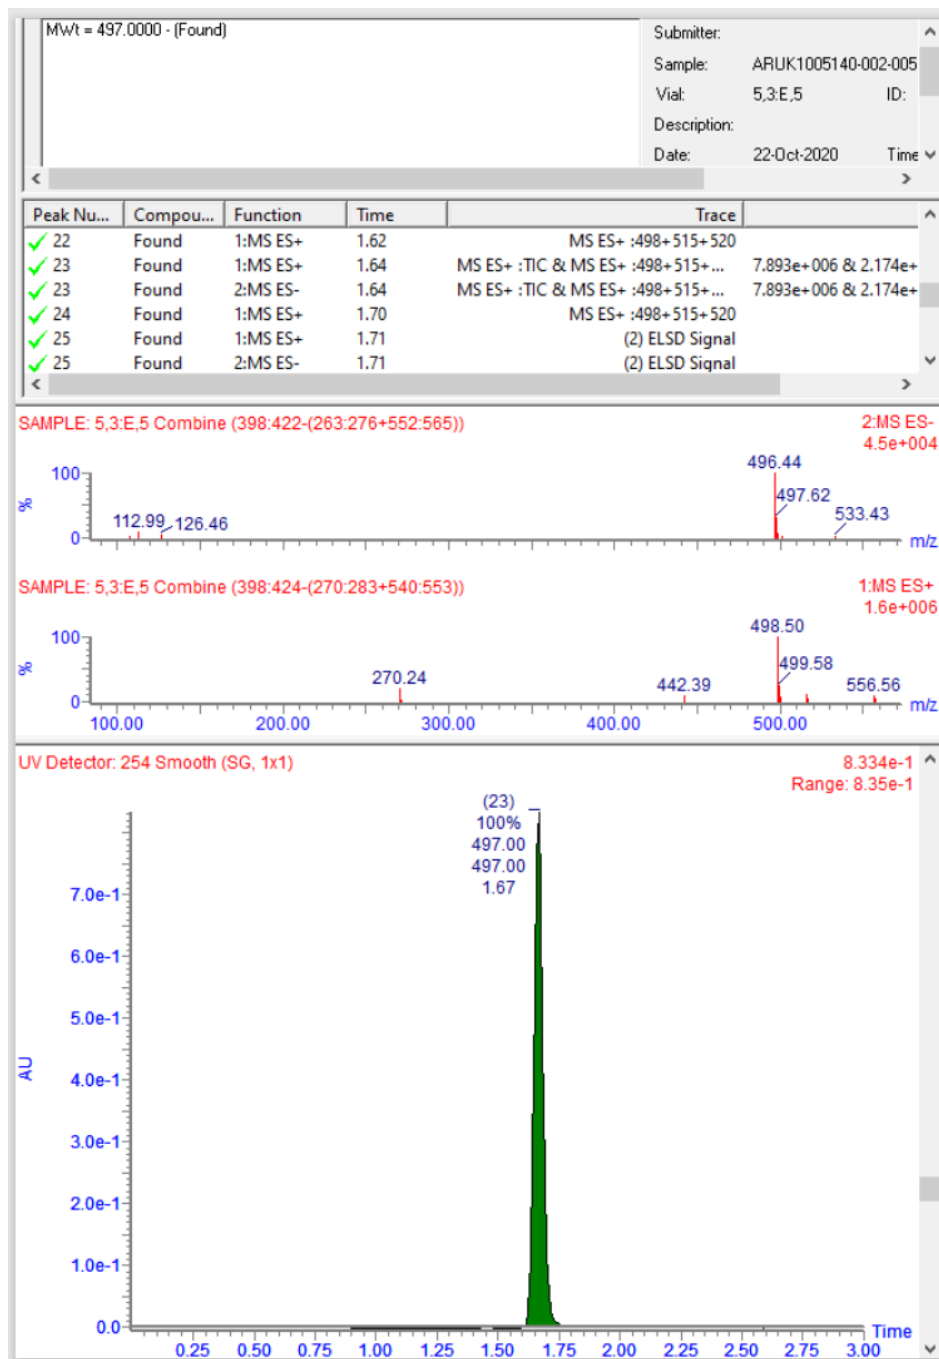

## Supplemental Figure 2

### 1:1 USP30:USP30<sub>inh</sub>

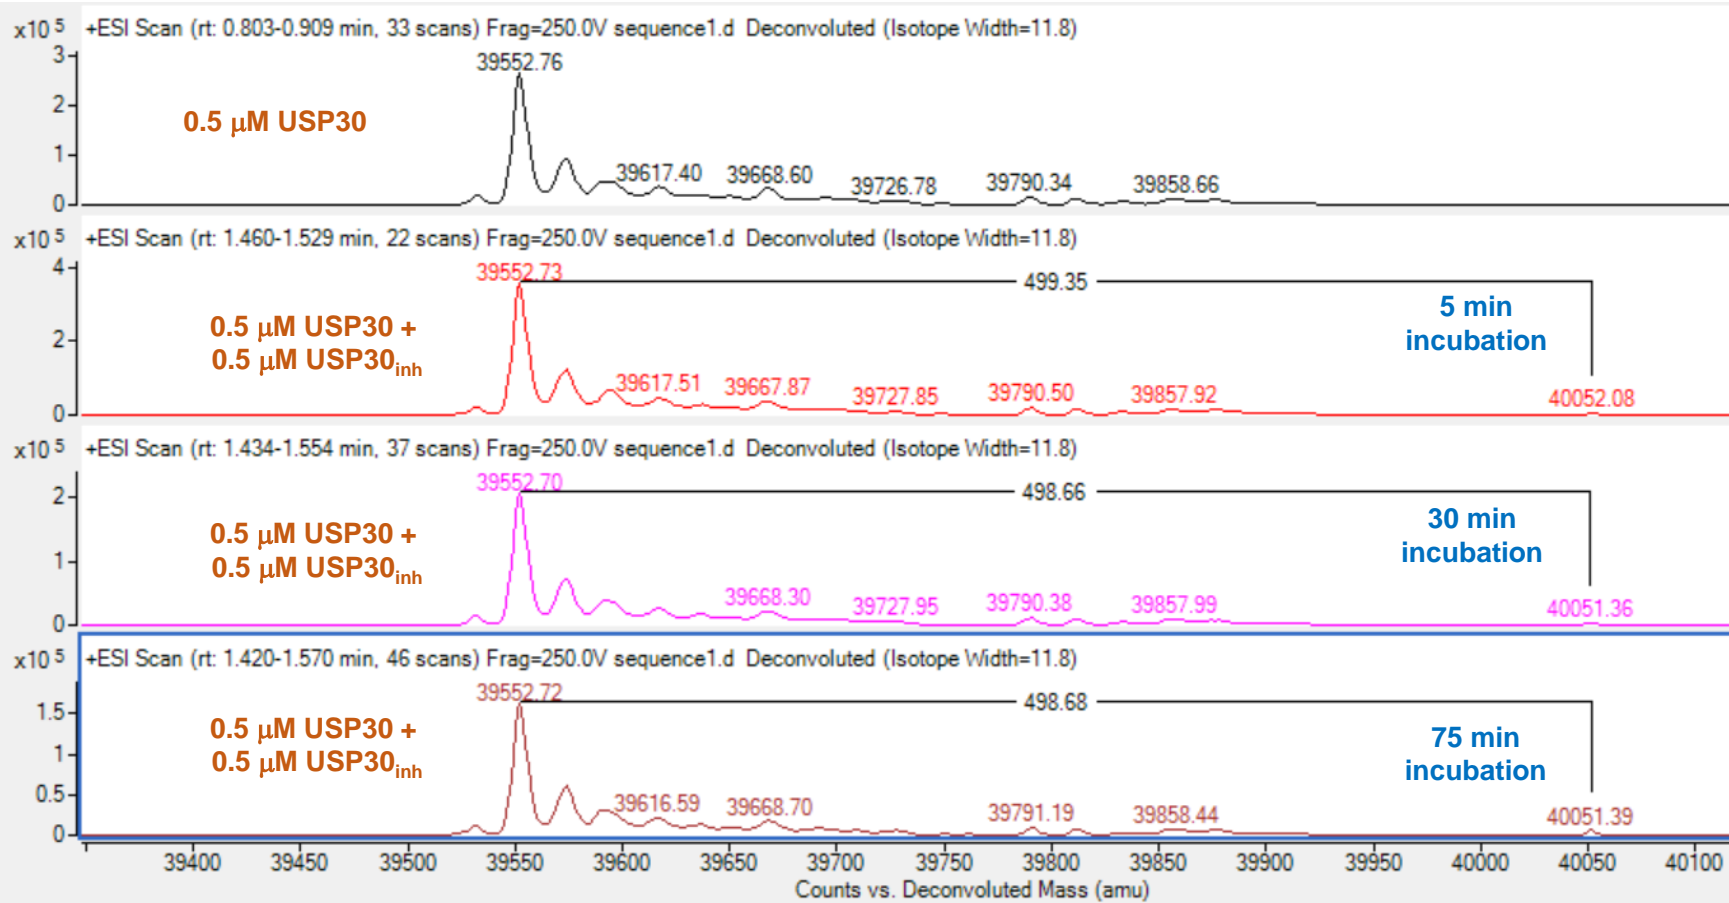

**USP30<sub>inh</sub>**

**MW: 497.6**

### USP30 (Viva)

- **MW: 39552.24 Da**
- insertion/deletion mutant: (64-178)-GSGS-(217-288)-G-(305-357) N346P, F348N, M350D, D352S, I353E, K355A, Y356S-SNA-(432-502)-6\*His + biotin tag

# Supplemental Figure 3

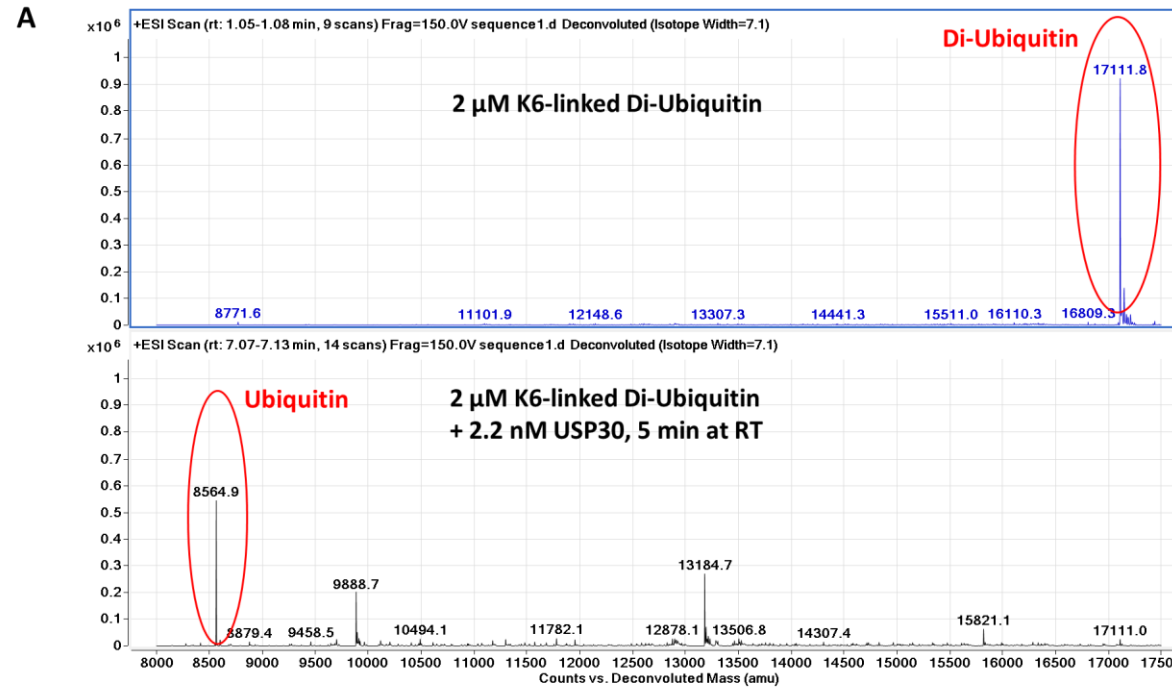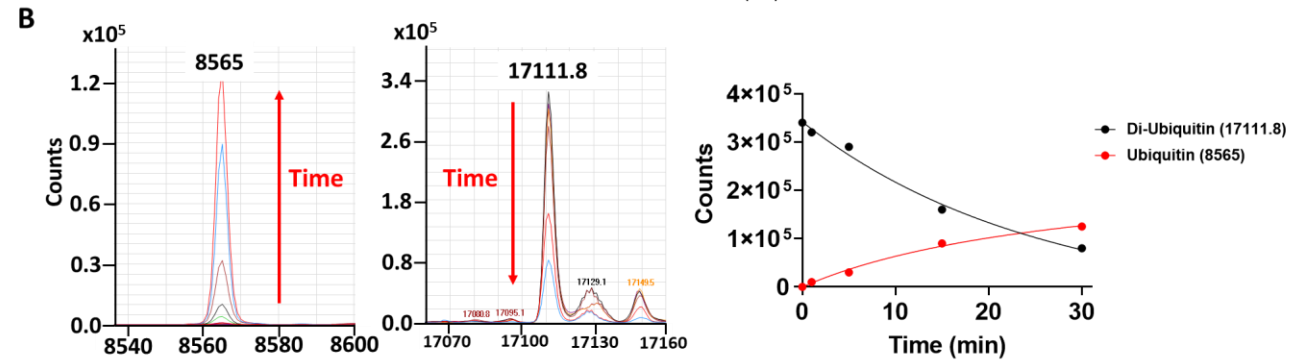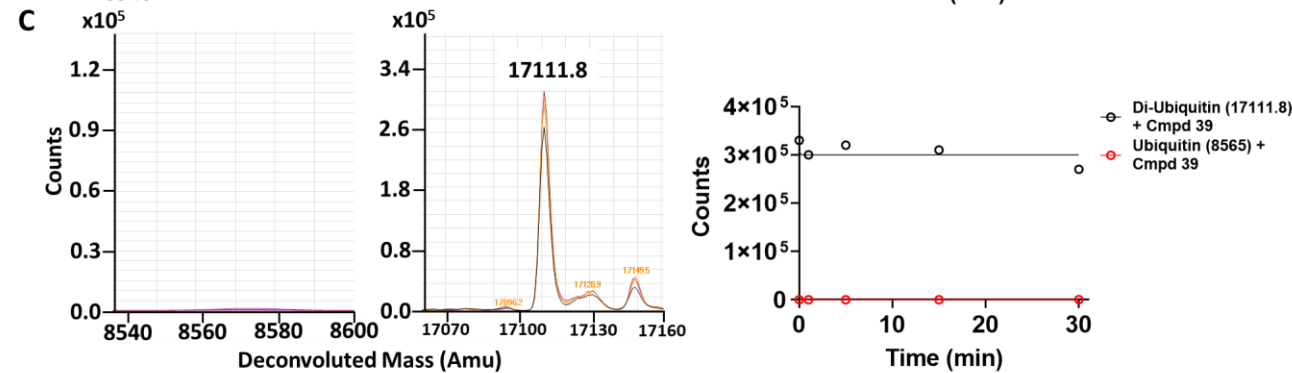

# Supplemental Figure 4

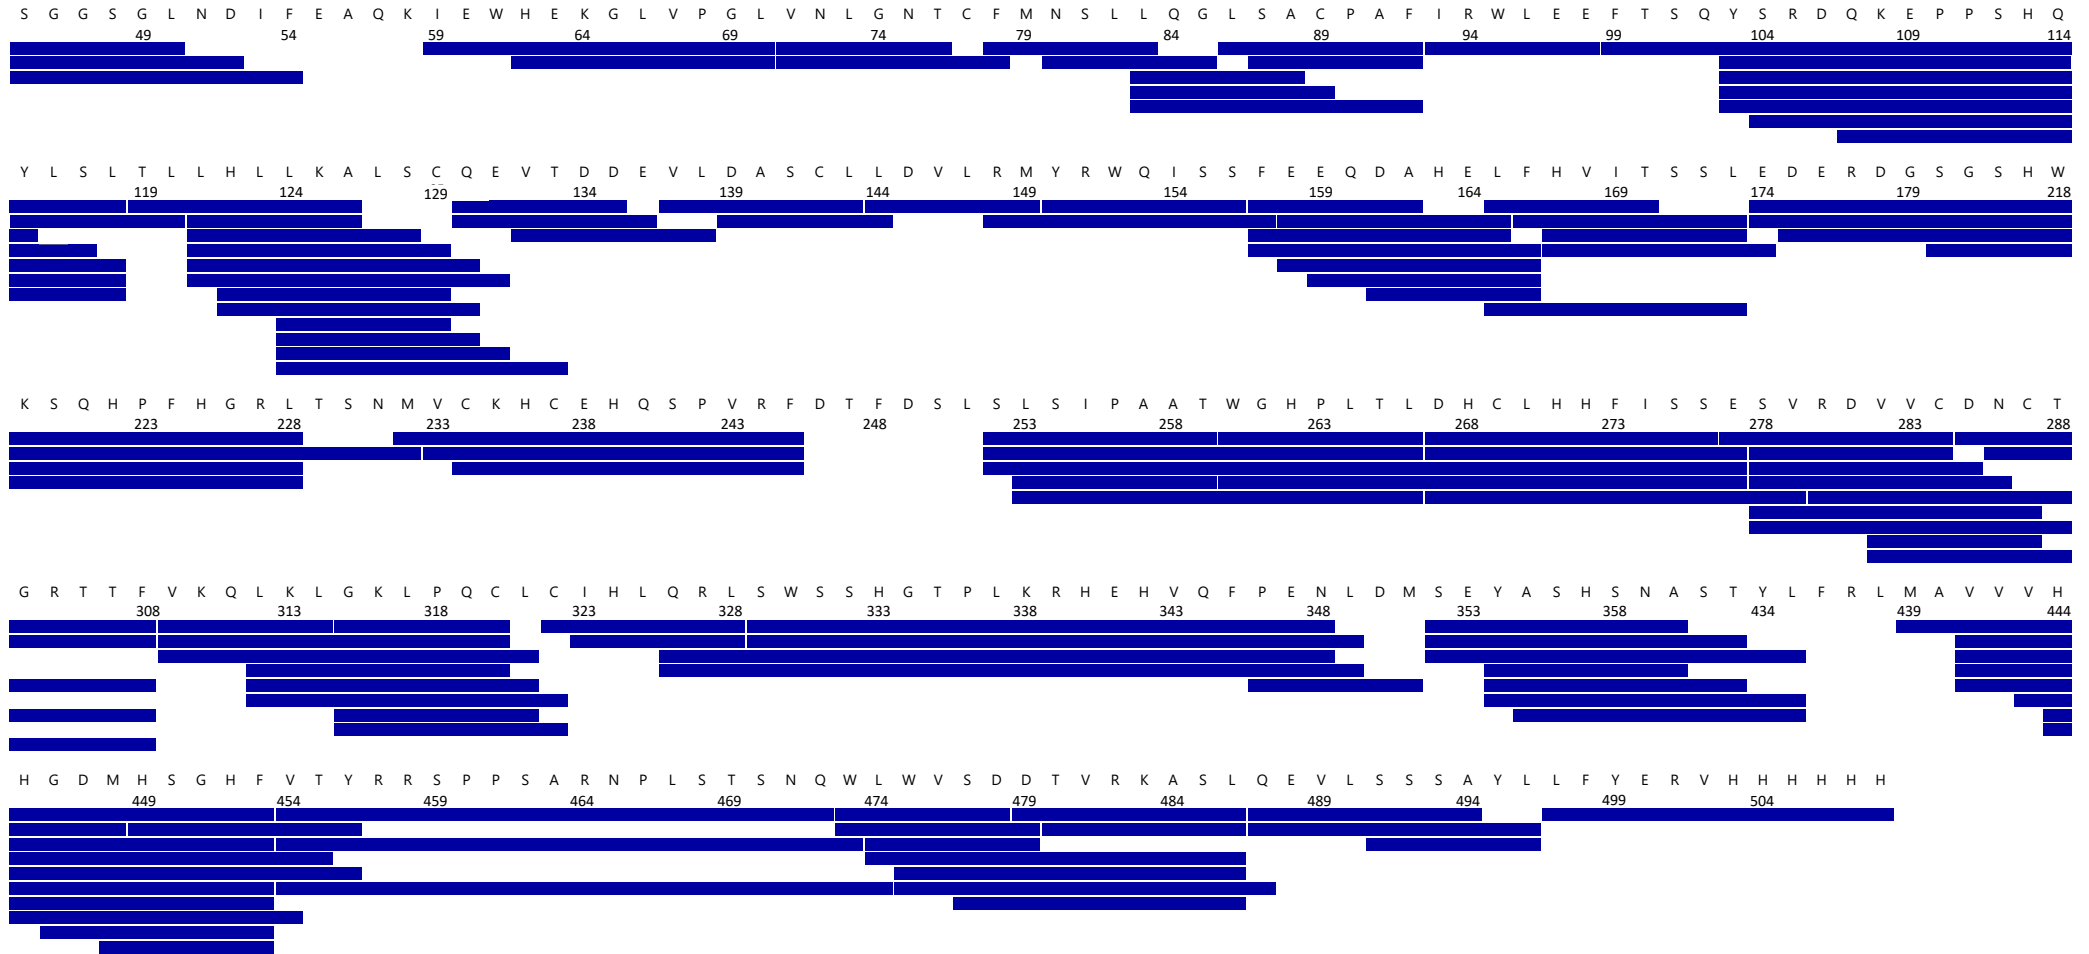

# Supplemental Figure 5

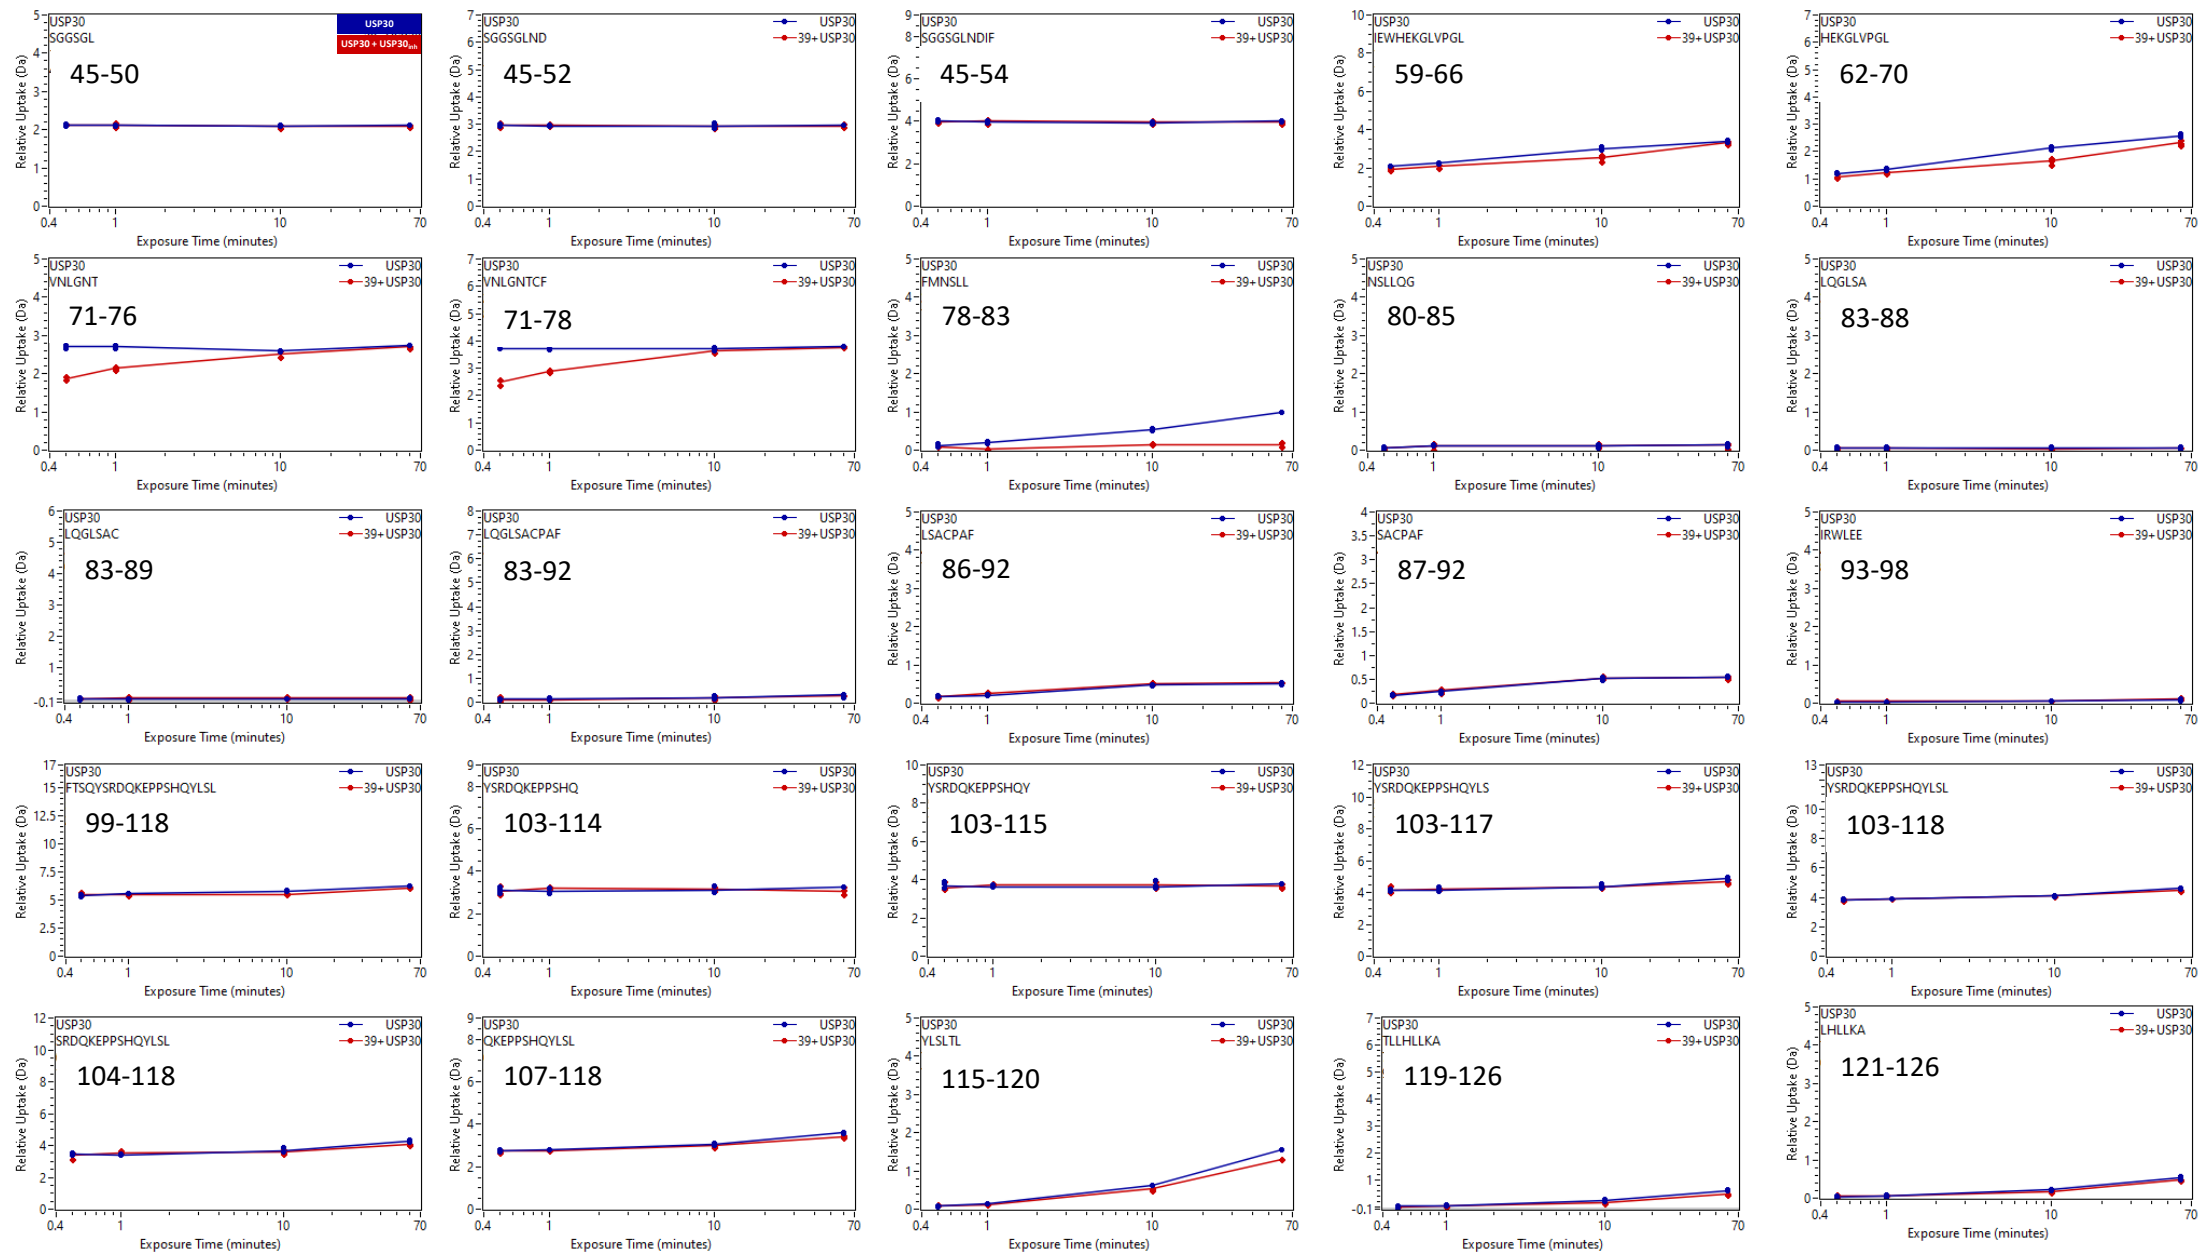

# Supplemental Figure 5 (continued)

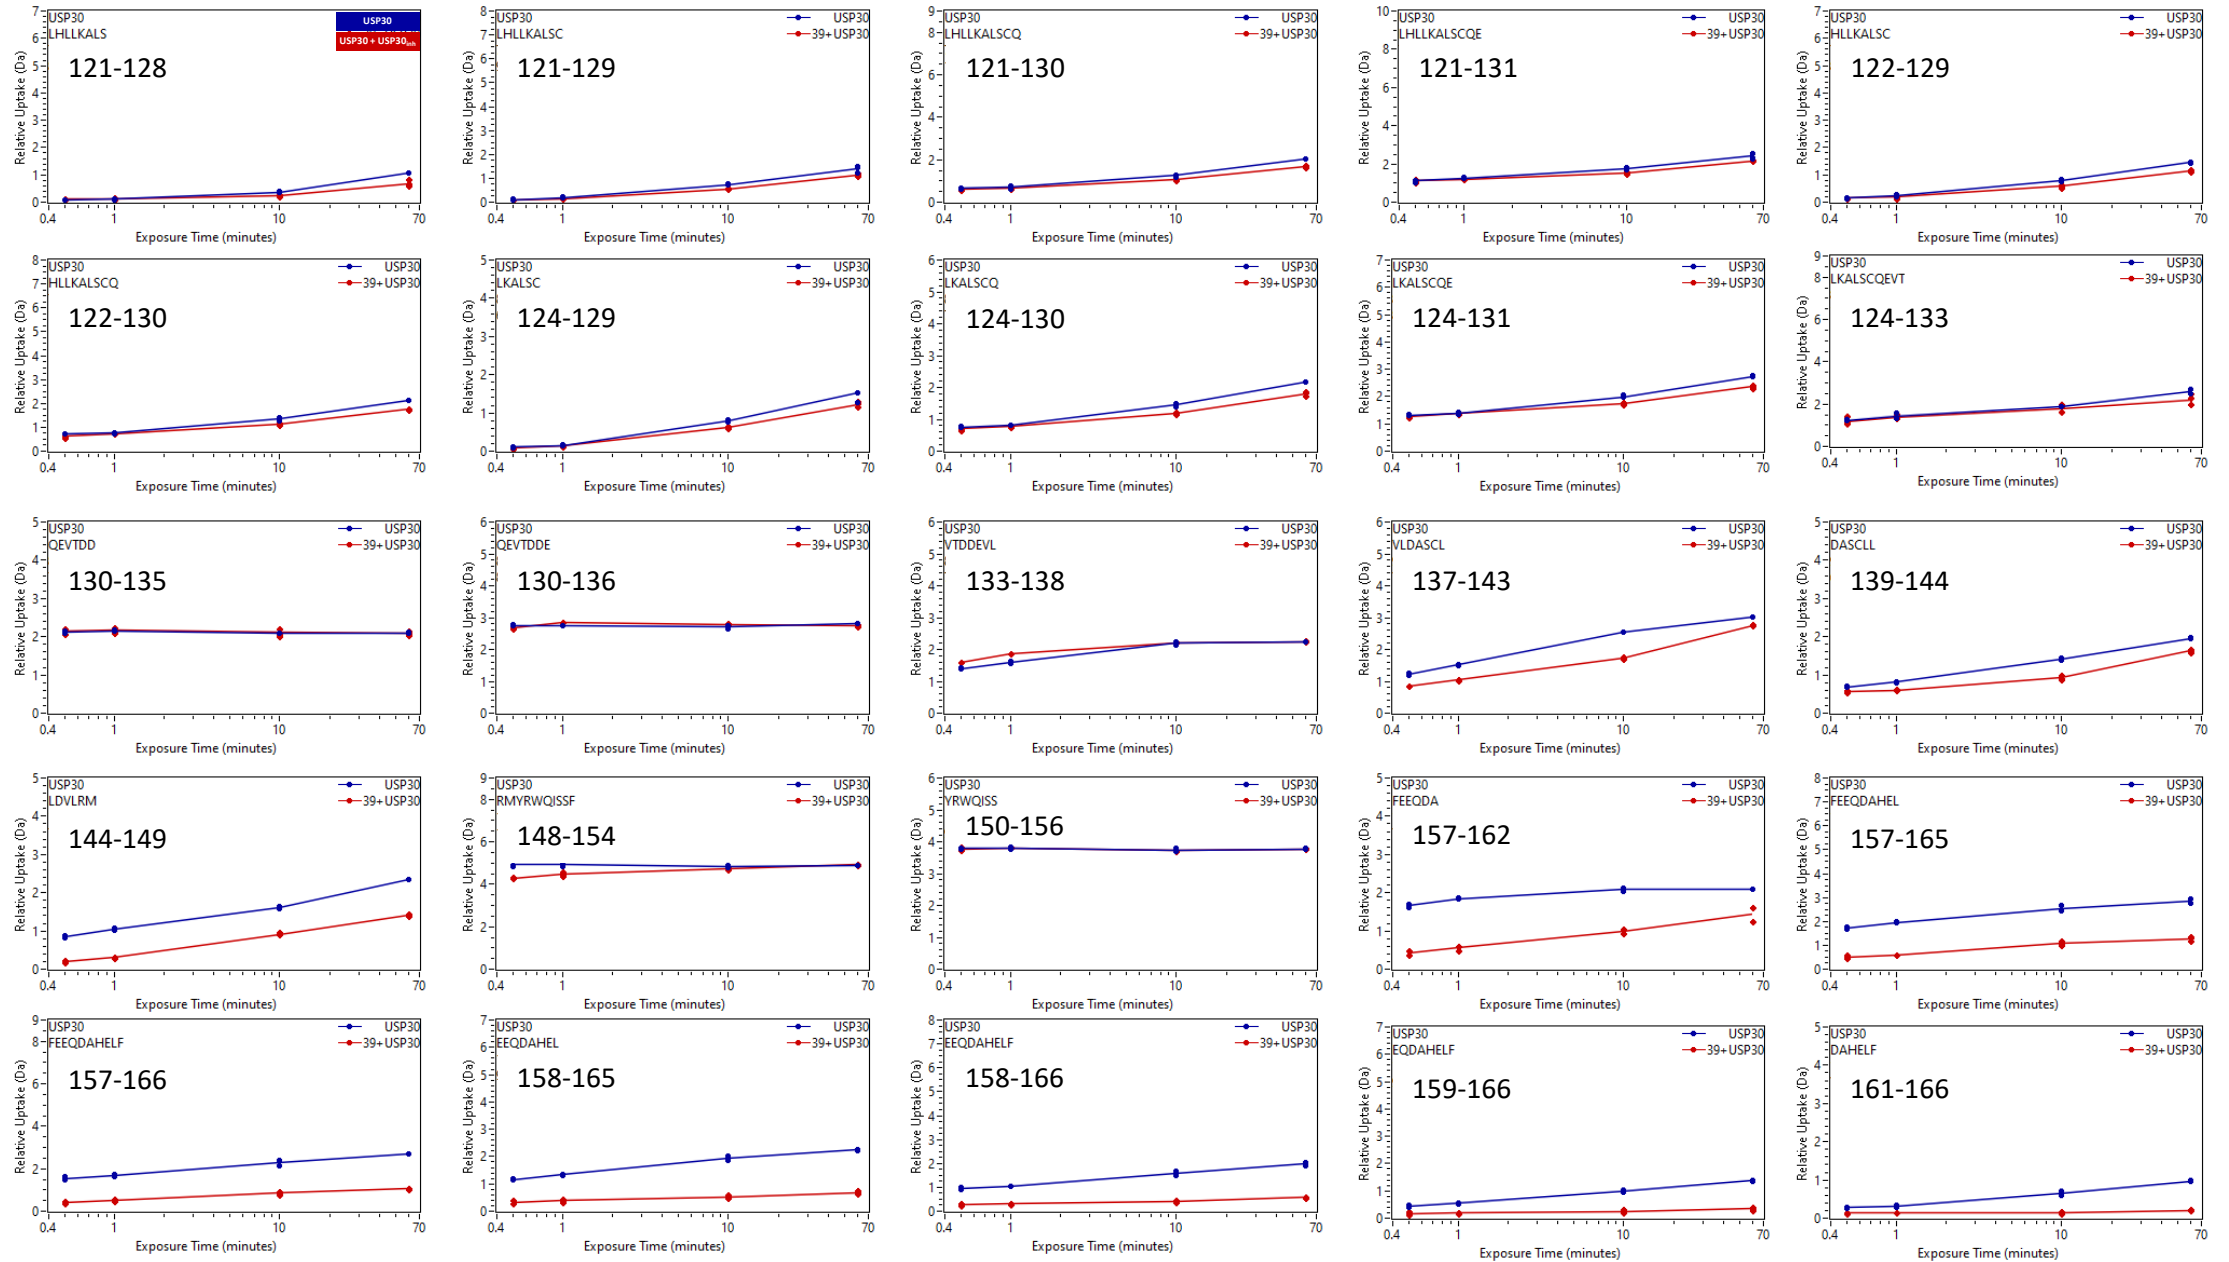

# Supplemental Figure 5 (continued)

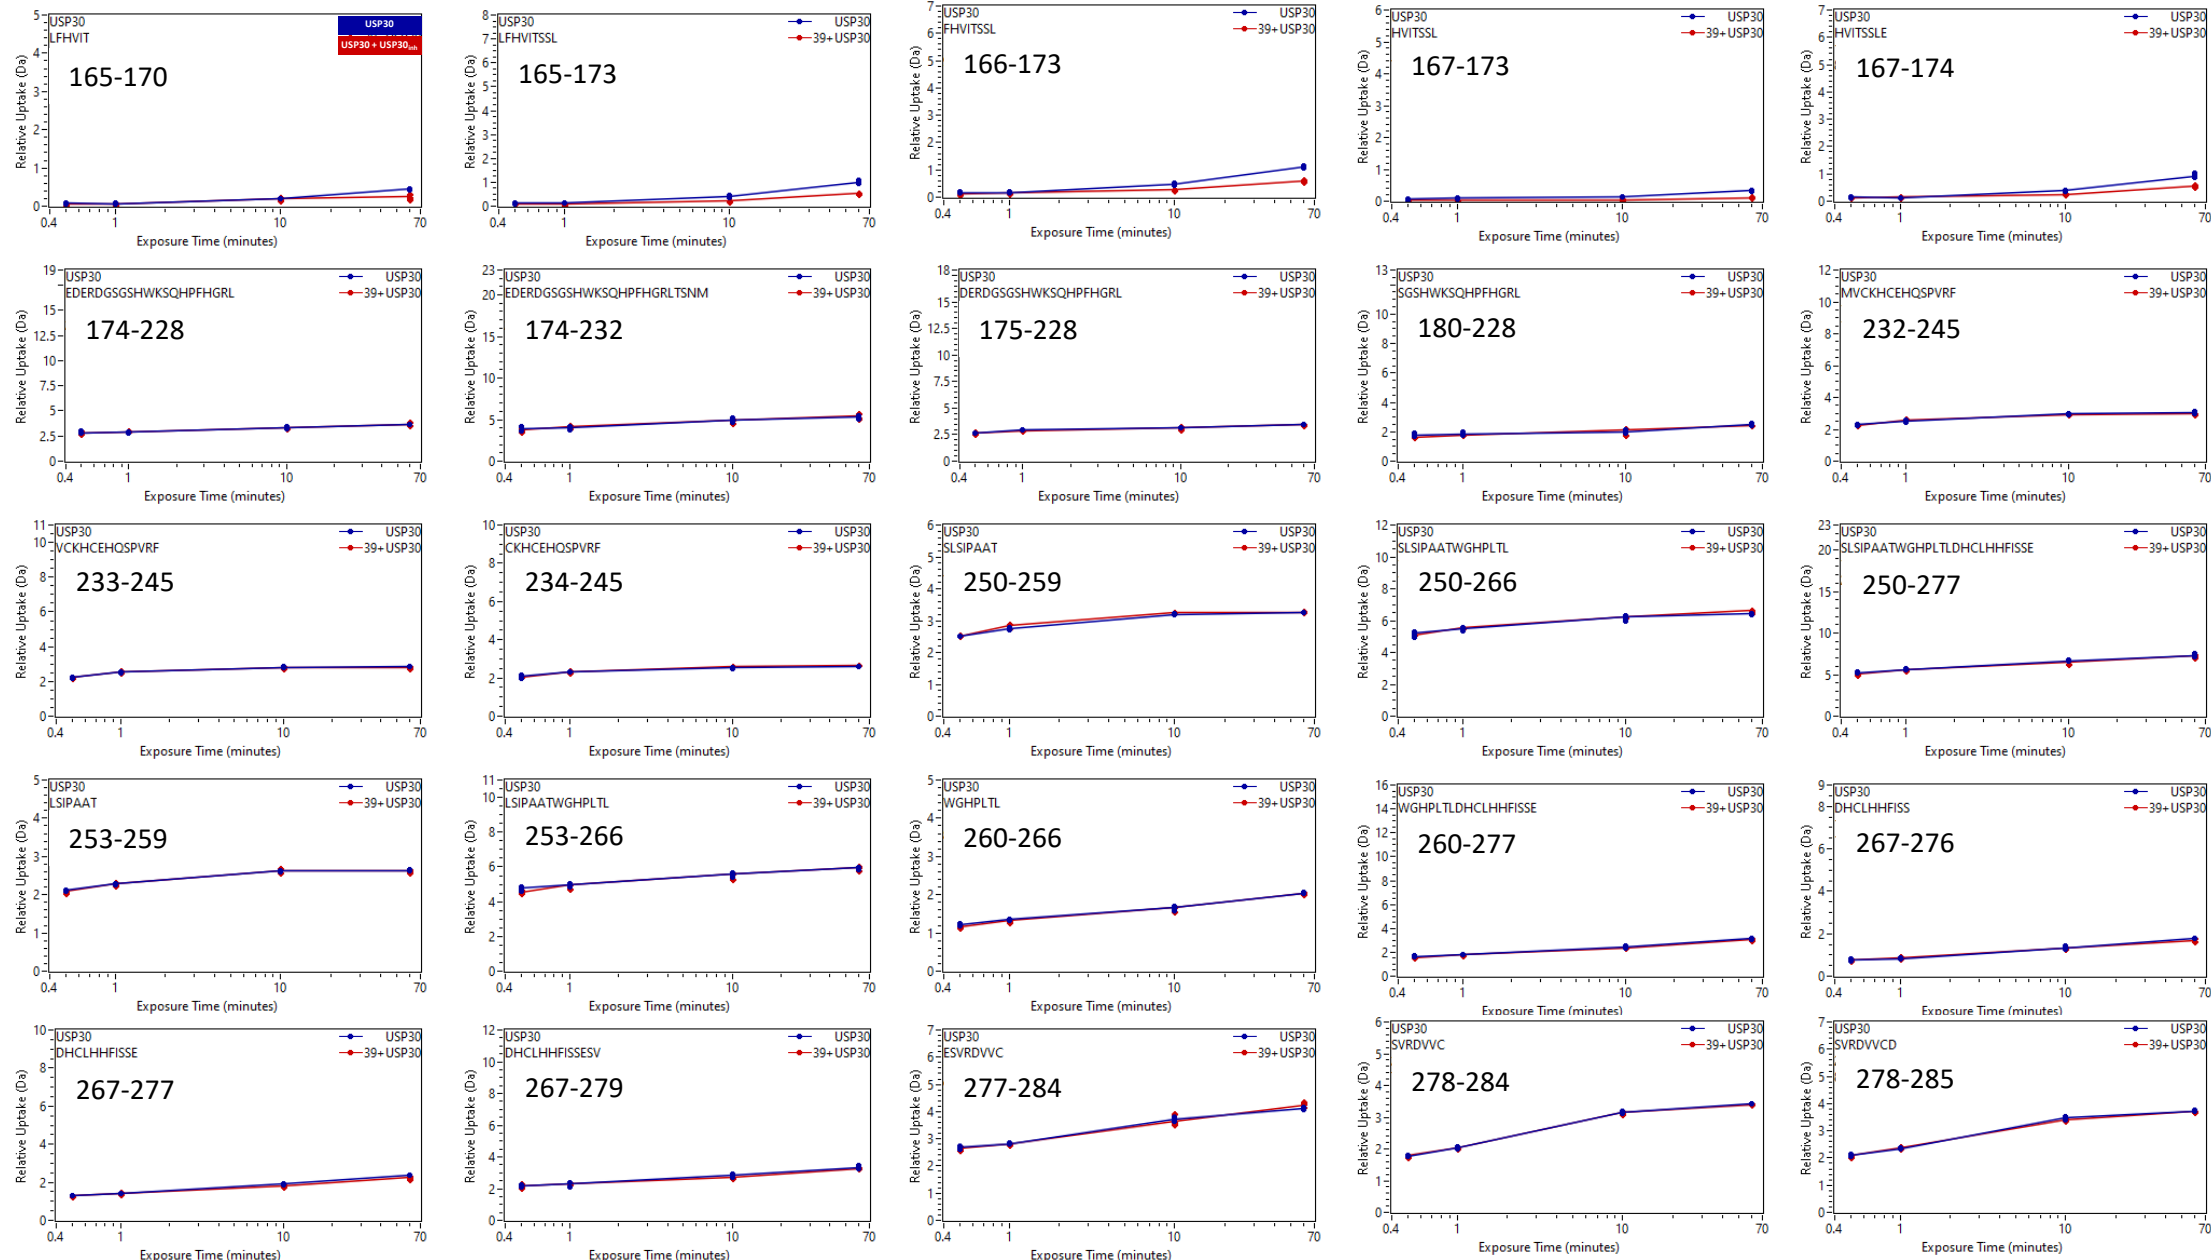



# Supplemental Figure 5 (continued)

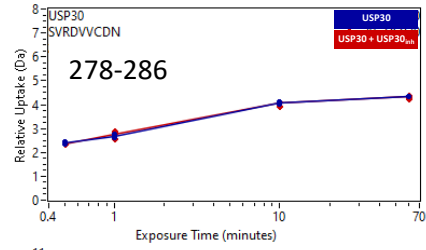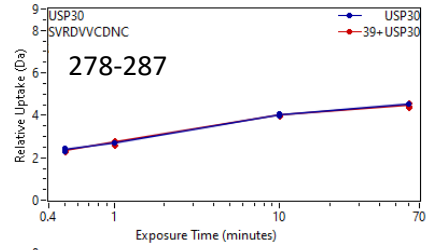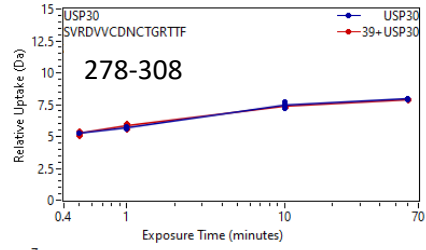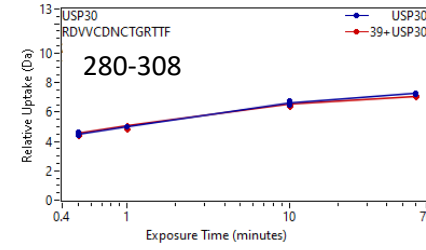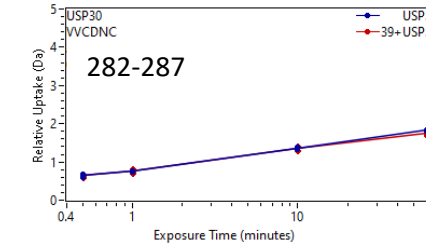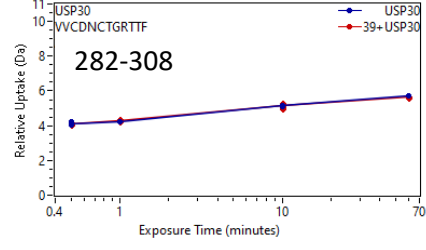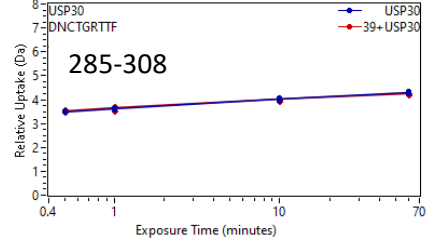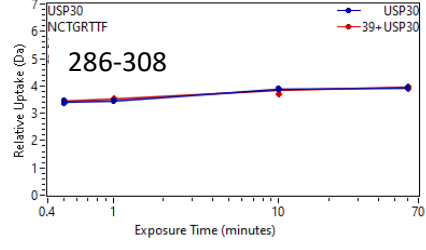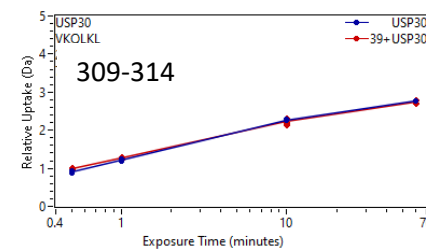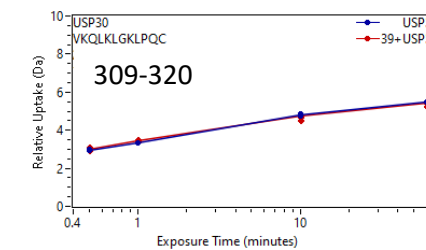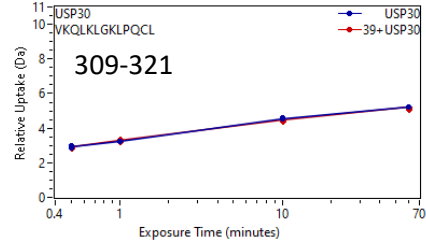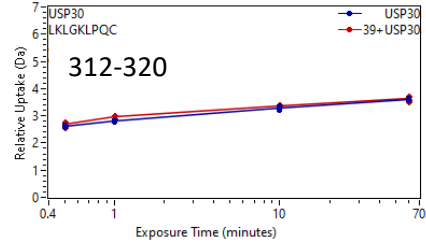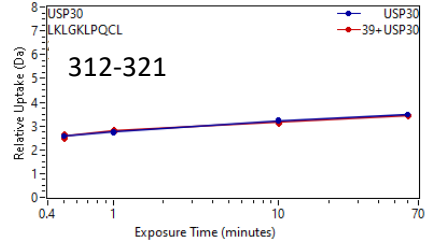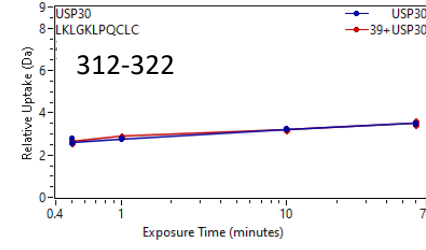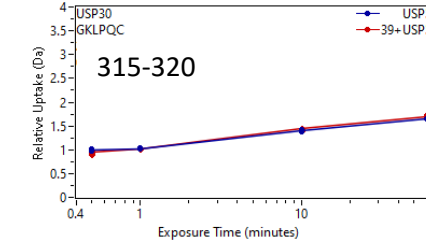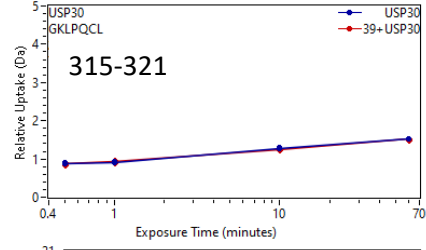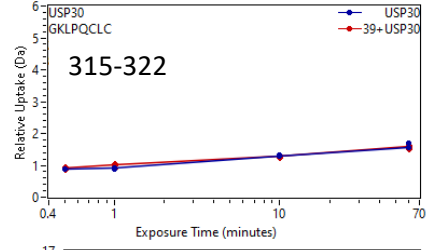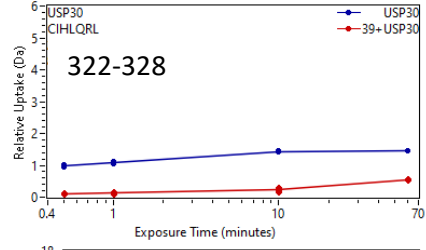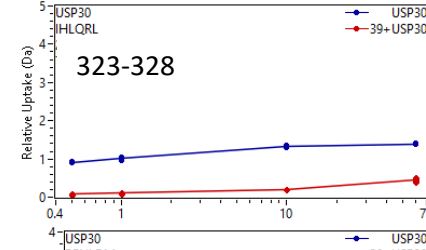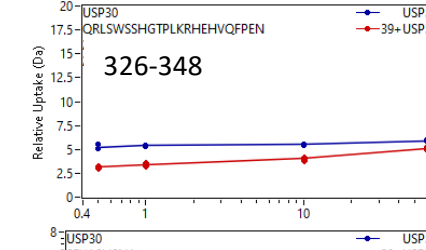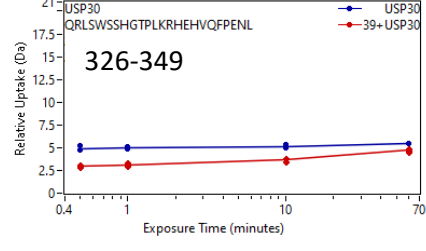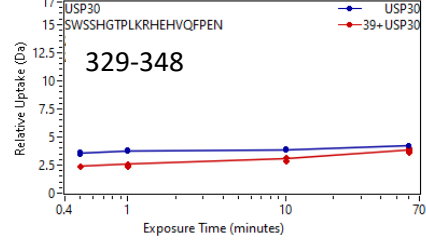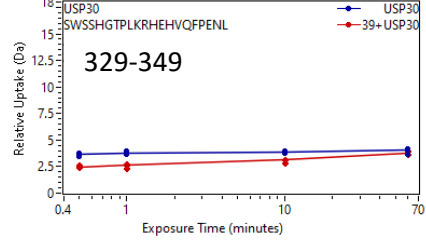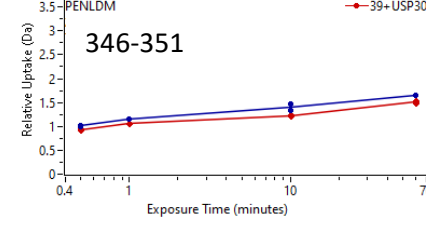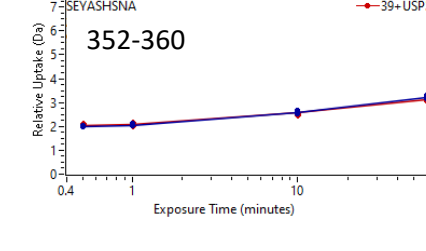

# Supplemental Figure 5 (continued)

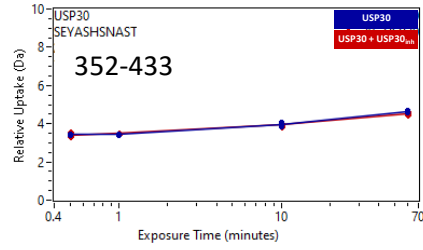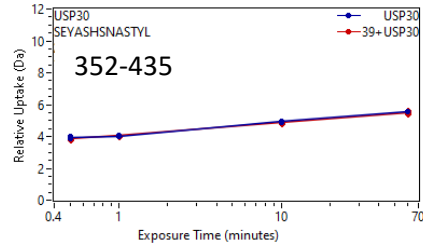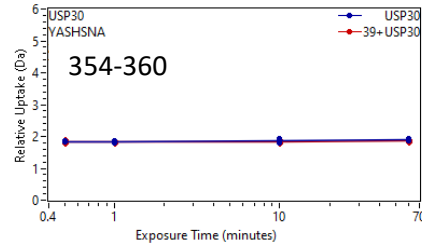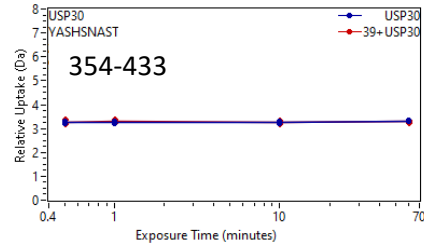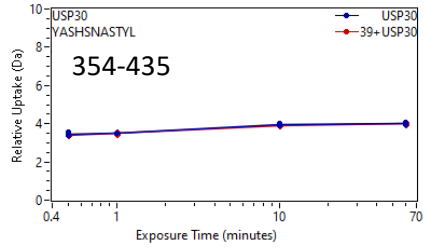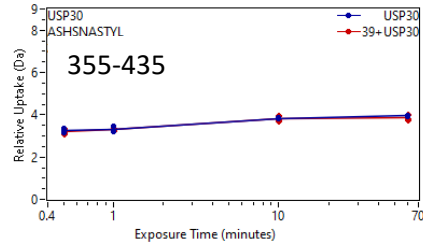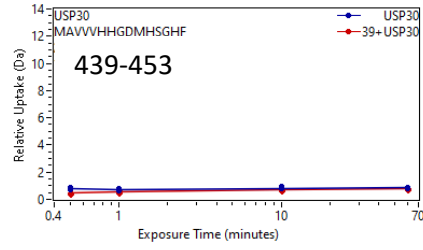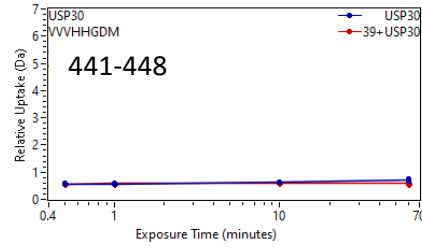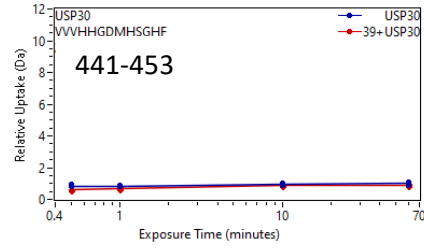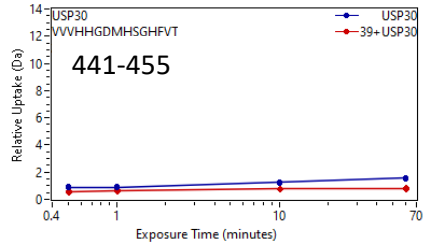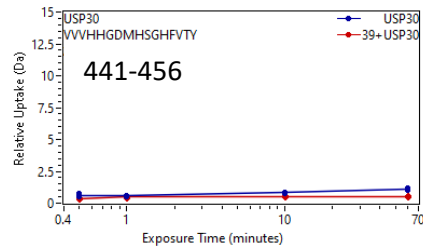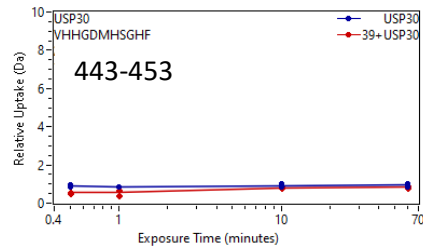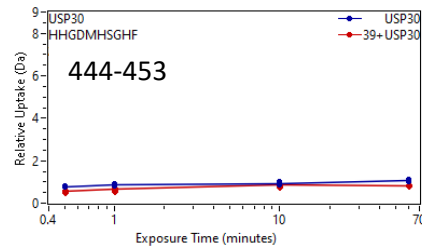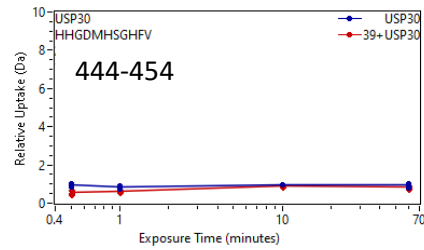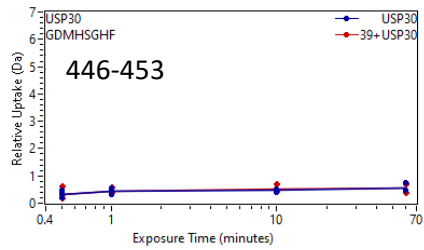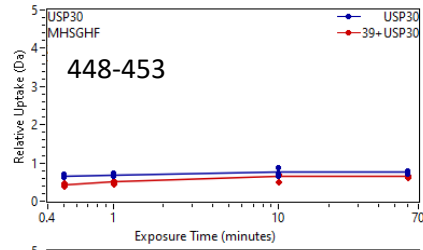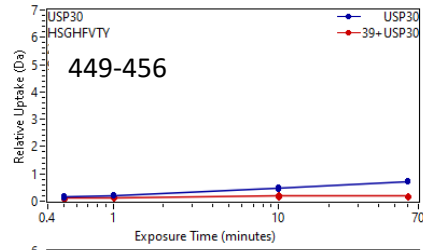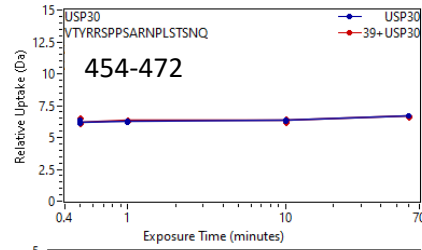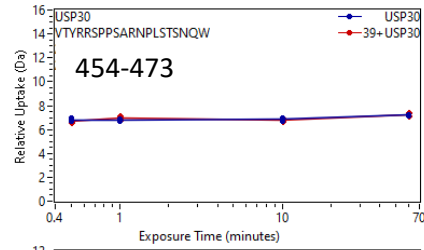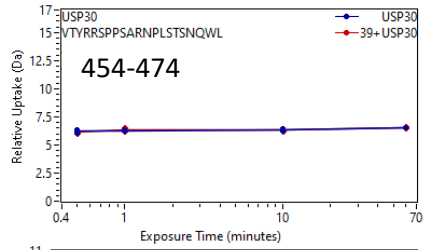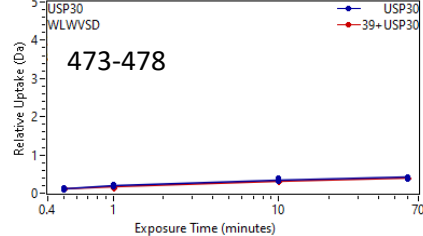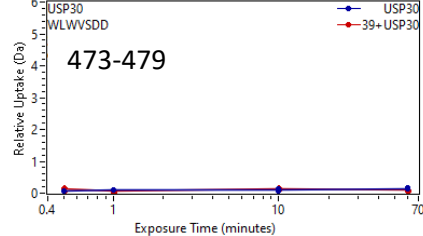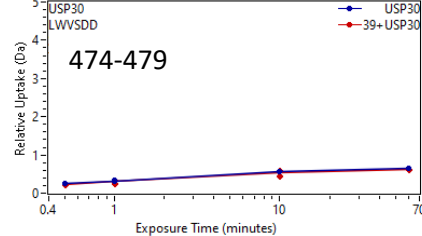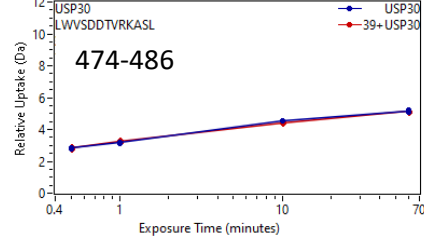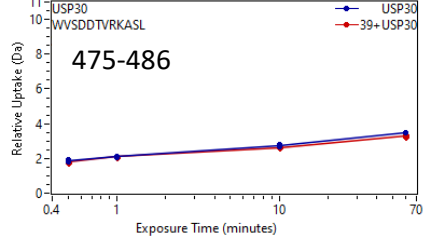

# Supplemental Figure 5 (continued)

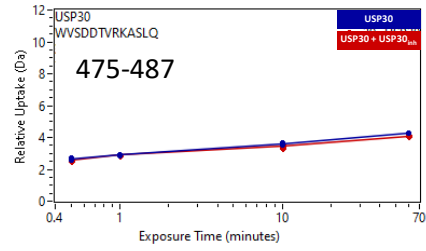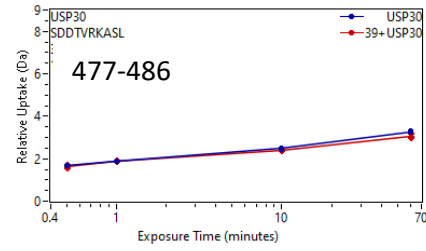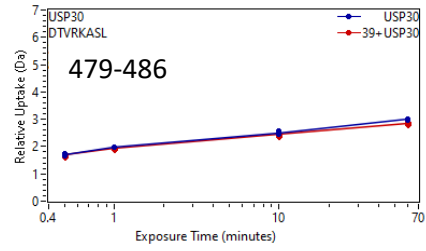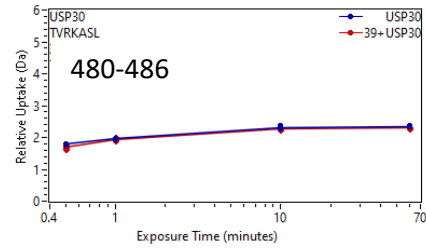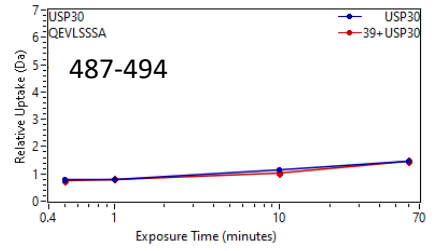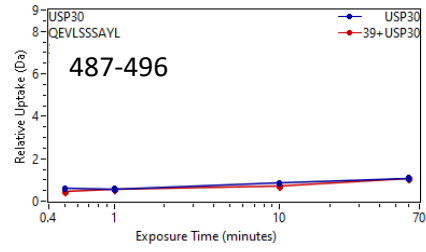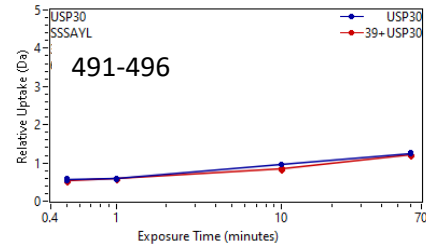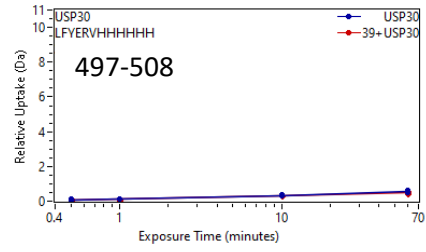

# Supplemental Figure 6

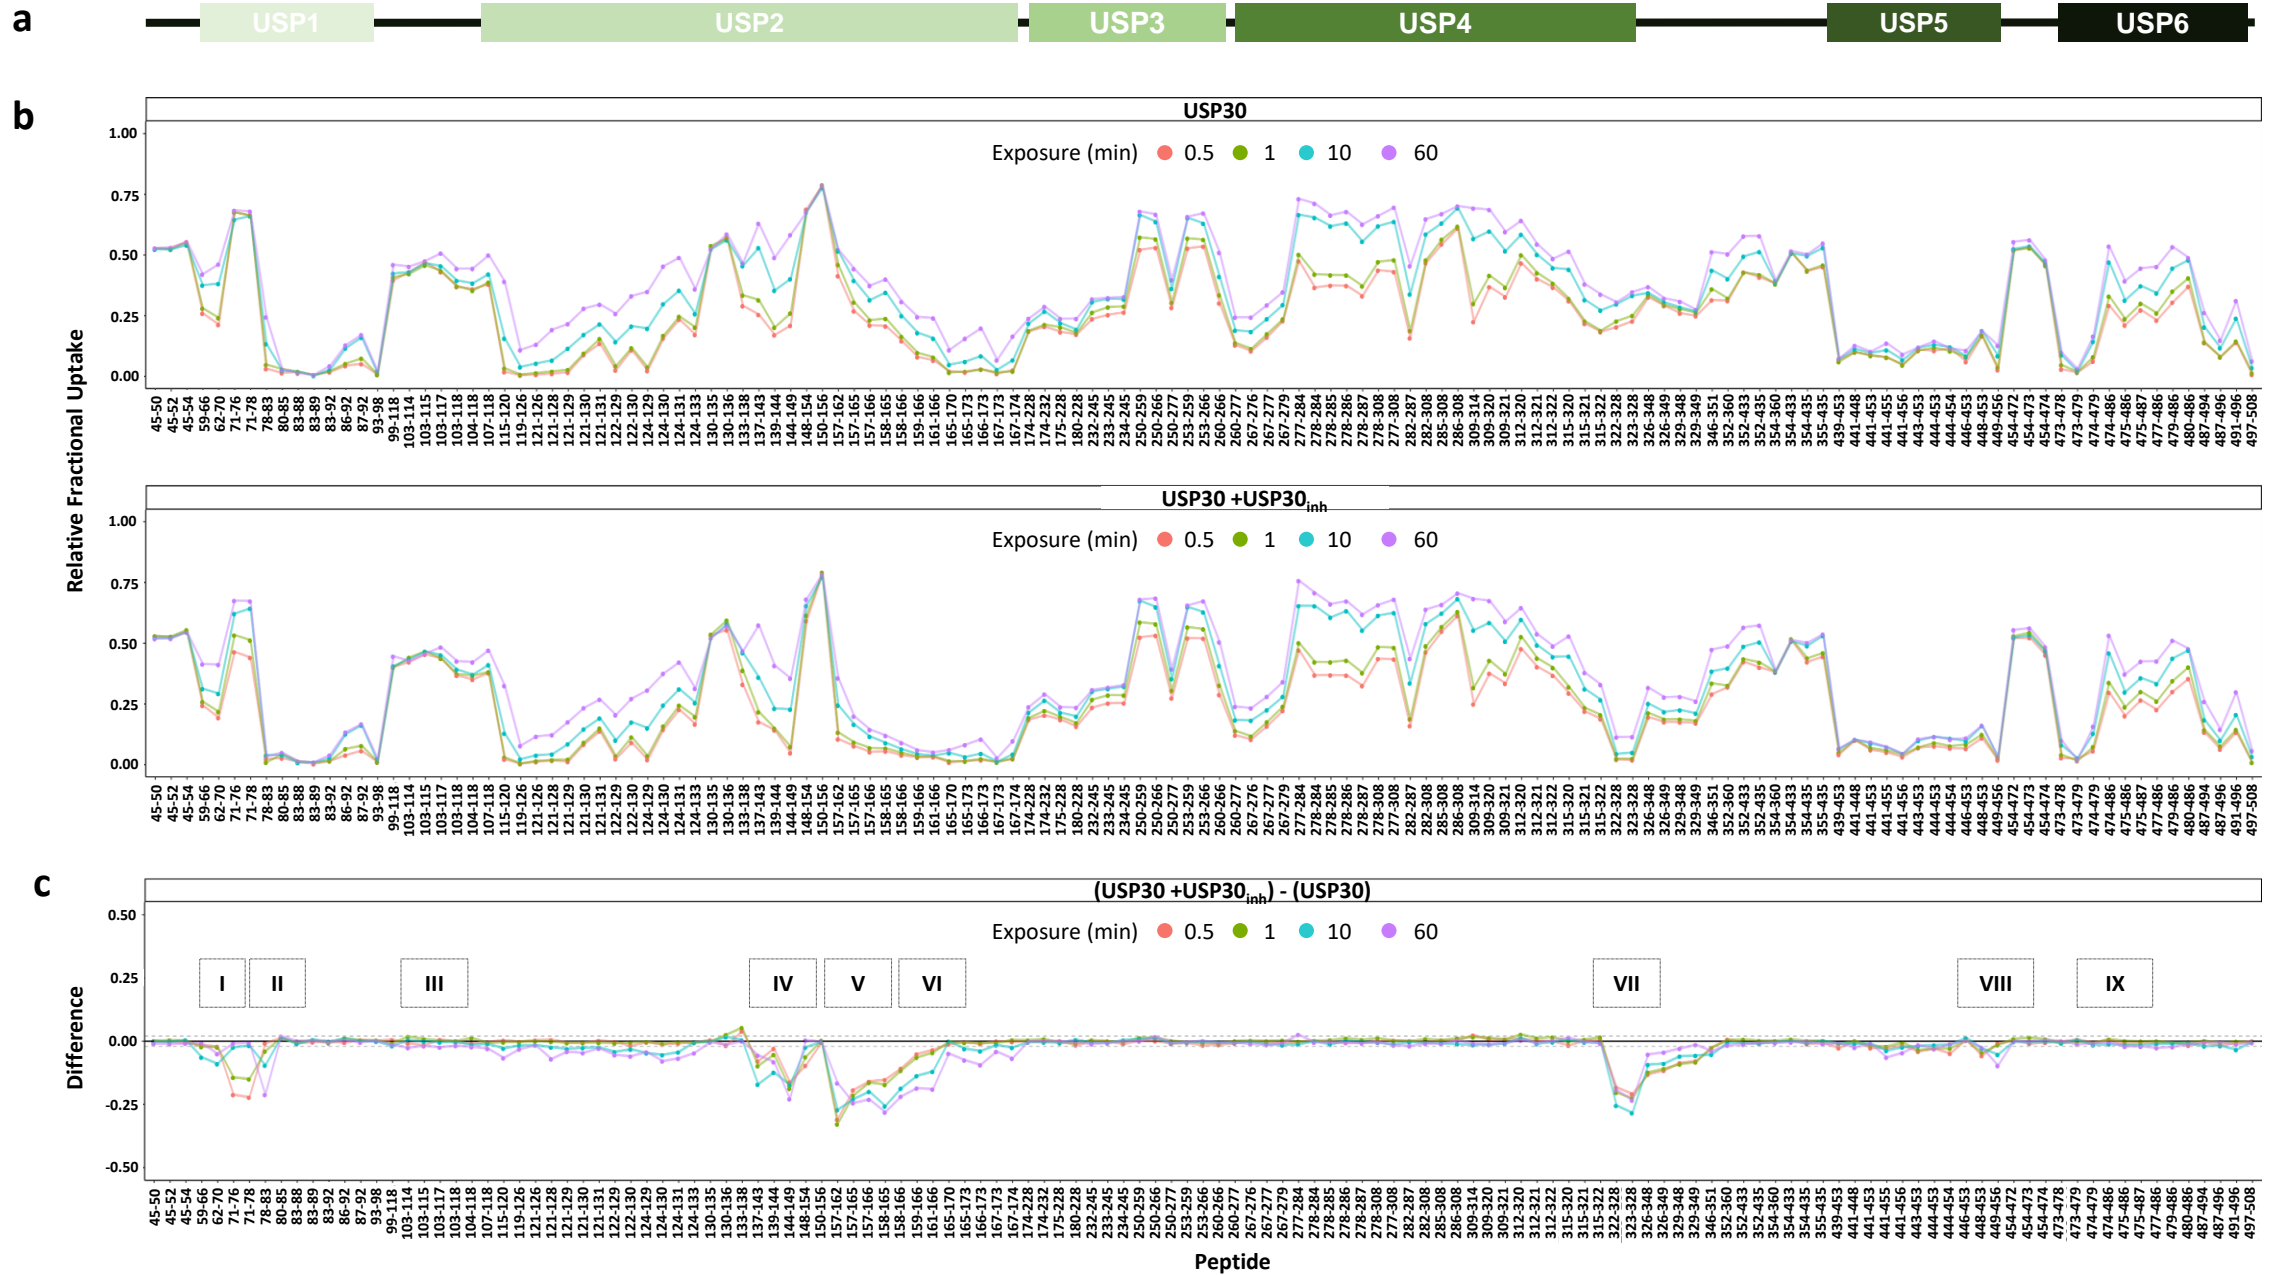

Supplemental Figure 7

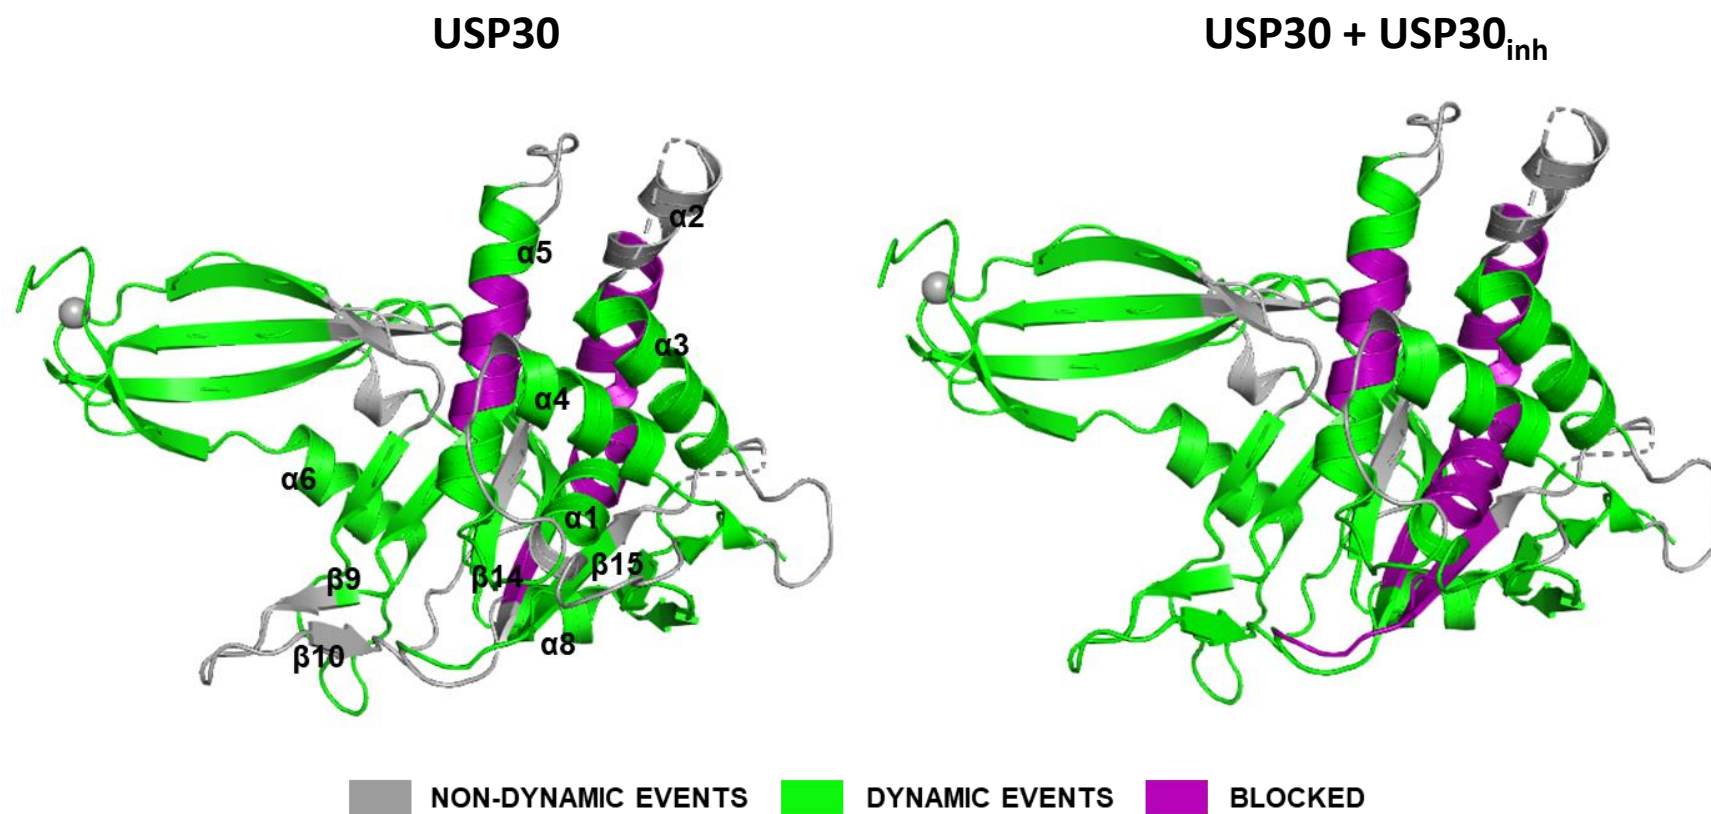

# Supplemental Figure 8

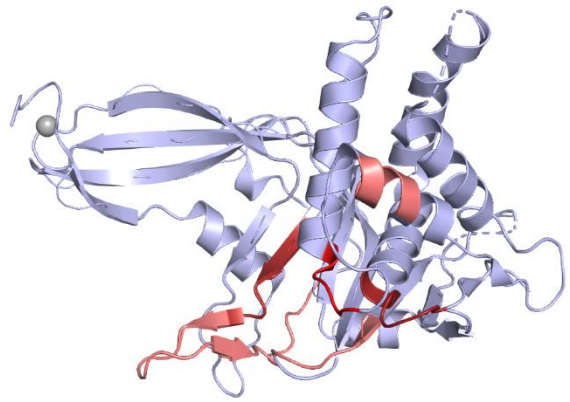

**30 sec**

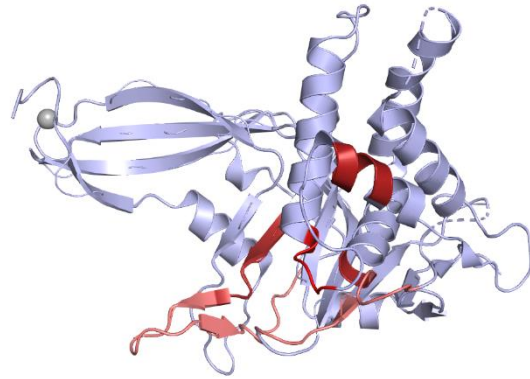

**60 sec**

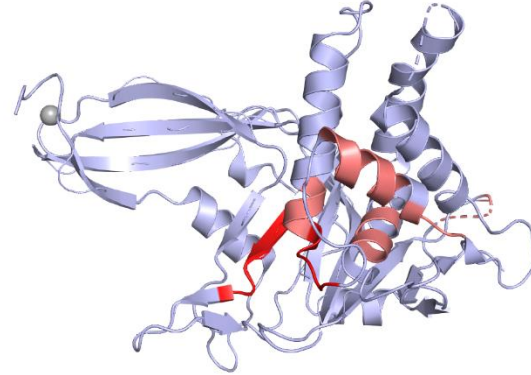

**600 sec**

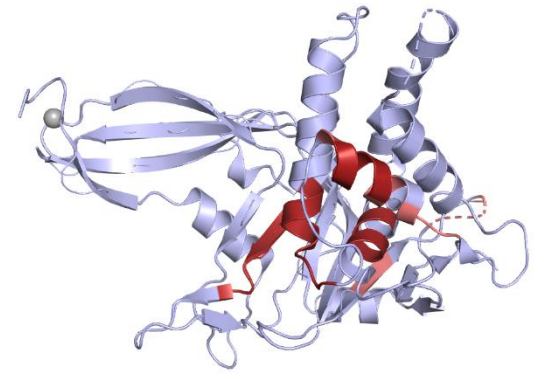

**3600 sec**

**PERTURBATION**

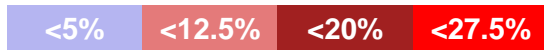

# Supplemental Figure 9

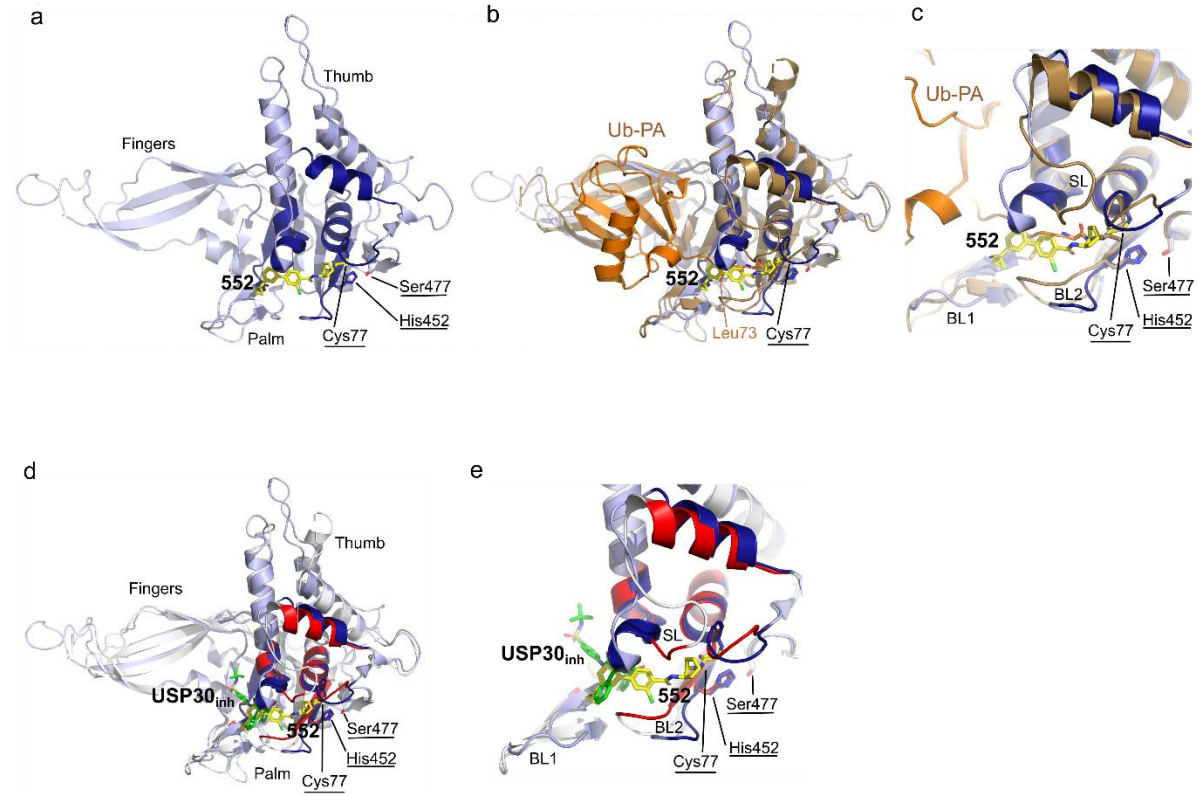

# Supplemental Figure 10

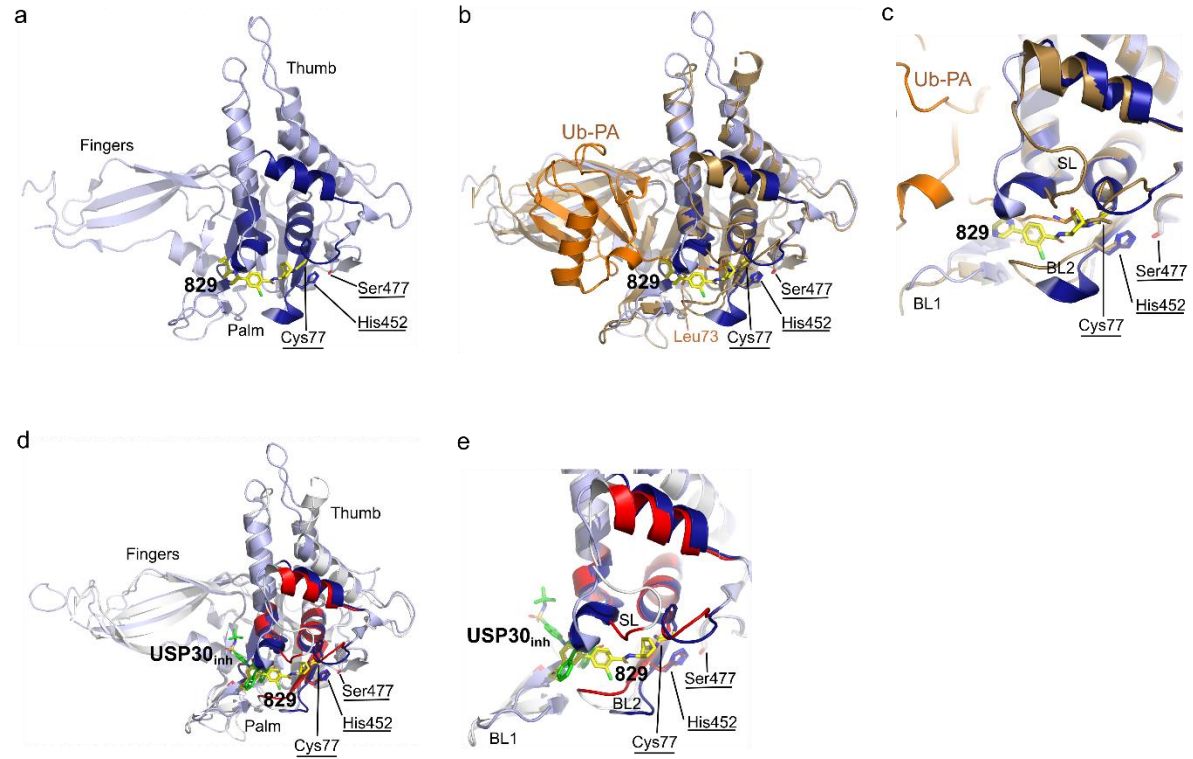

Supplement: mmc1.pdf [file mmc1.pdf]
